# Supplementary material
Source: PubMed Central journal article supplement (PMC3208989)
Supplement: supp_77.22.8052_Supplemental_Legends_Results.pdf [file supp_77.22.8052_Supplemental_Legends_Results.pdf]

## 1 **Supplementary Information.**

### 3 **Results**

5 Mass spectroscopy of peaks at RT 7.74 min, RT 8.92 min, RT 9.96 min, RT 10.89 min in  
6 Fig. S2A showed very similar mass spectra like the internal standard (RT 11.33, 3-  
7 hydroxyheptadecanoic acid). Only in the higher mass region, the fragments are shifted  
8 by either 14 or 28 m/z. Therefore the peaks were identified as the methyl esters of 3-  
9 hydroxydecanoic acid (RT 7.74 min), 3-hydroxydodecanoic acid (RT 8.92 min), 3-  
10 hydroxytetradecanoic acid (RT 9.96 min) and 3-hydroxyhexadecanoic acid (RT 10.89  
11 min), respectively. Three additional peaks eluting before the saturated C12, C14 and  
12 C16, 3-hydroxyfatty acid methyl esters had a similar mass spectrum (see example Fig.  
13 S2C of peak at RT 9.86 min) but the  $M^+ - 15$  Peak was 2 masses lower and indicates a  
14 molecule lacking 2 hydrogen atoms, this could be derived from mono-unsaturated fatty  
15 acid methyl esters.

### 17 **Localization of double bonds via dimethyl disulfide (DMDS), based on [1, 2]**

18 After DMDS derivatization, new peaks appeared (Fig. S3A) and their molecular peaks of  
19 m/z 394 (RT 11.45 min, Fig. S3D), m/z 422 (RT 12.40 min, Fig. S3B) and m/z 450 (RT  
20 13.21 min, Fig. S3C) revealed that they might have been formed by addition of one  
21 DMDS (M=94) to m/z 300 (mono-unsaturated 3-OH-dodecanoic methyl ester), m/z 328  
22 (mono-unsaturated 3-OH-tetradecanoic methyl ester) and m/z 356 (mono-unsaturated 3-  
23 OH-hexanoic methyl ester), respectively. According to the fragmentation pattern (Fig.  
24 S3E), fragments are formed as a result of the cleavage of the bond between the carbon  
25 atom bearing the methylthiol group. The fragment comprising the methylated carboxy

1 group further fragments by losing m/z 32 (methanethiol). Fig. S3E shows this  
2 fragmentation for the DMDS derivatized 3-hydroxy-7-tetradecenoic methyl ester (m/z  
3 422) where the double bond is in the  $\omega$ 7 position. The characteristic fragments m/z 422,  
4 m/z 277, m/z 245 and m/z 145 were also seen in the mass spectrum of peak RT 12.40  
5 (Fig. 3SB). The mass spectrum of peak RT 13.21 (Fig. S3C) was very similar, only the  
6 fragments in the higher mass region were shifted by 28 mass units. This is consistent  
7 when the double bond is now again in  $\omega$ 7 position (m/z 145) but - since the chain is 2  
8 carbon atoms longer - has moved from position 7 to position 9 (m/z 305, m/z 273). The  
9 structure of peak RT 13.21 was therefore determined to be the DMDS derivate of 3-  
10 hydroxy-9-hexadecenoic methyl ester (m/z 450). The only peaks showing a molecular  
11 peak of m/z 394 (DMDS adduct of 3-hydroxy-dodecenoic methyl ester) were RT 11.42  
12 and RT 11.45 with a very similar mass spectrum (Fig. S3E for RT 11.45). Since it was  
13 lacking the characteristic pair of fragments in the higher mass region the localization of  
14 the double bond remained unclear.

## 15 **References**

- 16 1. Dunkelblum, E., Tan, S.H., Silk, P.J. *Journal of Chemical Ecology*, Vol 11, No. 3,  
17 1985
- 18 2. Bauer, S.: *Die Zusammensetzung der Oberflaechenwachse von Tomaten, Paprika und*  
19 *Auberginen*, Dissertation, University of Muenster, Germany 2003

20

21

## 22 **Figure Legends.**

23

1 **Fig. S1.** Sequence alignment of bacterial carboxy methyl transferases. Sequences were  
2 from *M. marinum* (Mmar\_3356), *Mycobacterium ulcerans* Agy99 (Mul\_1287),  
3 *Mycobacterium avium* 104 (MAV\_2179), *Mycobacterium sp. KMS* (MKMS\_3444),  
4 *Mycobacterium sp. JLS* (Mjls\_3393), *Mycobacterium vanbaalenii* PYR-1 (Mvan\_3770),  
5 *Mycobacterium gilvum* PYR-GCK (Mflv\_2764), *M. smegmatis* (Msmeg\_4347) and *A.*  
6 *thaliana* jasmonate methyltransferases (JMT).

7  
8 **Fig. S2.** (A) Section of GCMS TIC trace where relevant compounds eluted. (B) Mass  
9 spectrum of compound at RT 9.96 min. (C) Mass spectrum of compound at RT 9.86 min.  
10 (D) Mass spectrum of compound at RT 8.83 min. (E) Mass spectrum of compound at RT  
11 10.81 min.

12  
13 **Fig. S3.** (A) Section of GCMS TIC trace where relevant compounds eluted. (B) Mass  
14 spectrum of compound at RT 12.40 min. (C) Mass spectrum of compound at RT 13.21  
15 min. (D) Mass spectrum of compound at RT 11.45 min. (E) Proposed fragmentation of  
16 DMDS- and TMS-derivatized 3-hydroxy-7-tetradecenoic acid.

17  
18
